BAX is necessary for neuronal death following exposure to isoflurane during the neonatal period

Short Title: BAX mediates isoflurane induced neuronal death

Andrew M. Slupe<sup>a</sup>, Laura Villasana<sup>a</sup>, Kevin M. Wright<sup>b,\*</sup>

<sup>a</sup>Department of Anesthesiology and Perioperative Medicine, Oregon Health & Science University, Portland, OR, United States of America

<sup>b</sup>Vollum Institute, Oregon Health & Science University, Portland, OR, United States of America

\*Corresponding Author

Email: [wrihke@ohsu.edu](mailto:wrihke@ohsu.edu)

Author Contributions: AMS and KMW participated in overall study design and execution as well as manuscript preparation. LV participated in animal behavioral experiments and manuscript preparation.

1 **Abstract**

2 Exposure to volatile anesthetics during the neonatal period results in acute  
3 neuronal death in rodent and non-human primate models, potentially leading to lasting  
4 cognitive deficits. We used *Bax*<sup>-/-</sup> mice to show that neuronal death following neonatal  
5 exposure to isoflurane is mediated by the apoptotic pathway, and that GABAergic  
6 interneurons are selectively vulnerable. Neonatal *Bax*<sup>-/-</sup> mice also showed attenuated  
7 microglial activation after exposure to isoflurane, indicating that neuroinflammatory  
8 response is secondary to neuronal apoptosis. Isoflurane-induced neuronal apoptosis in  
9 neonates appeared to have little effect on seizure threshold or cognitive function later in  
10 life. Collectively, these findings define the acute injury mechanism of volatile anesthetics  
11 during the neonatal period.

12

13

## 14 **Introduction**

15           Exposure to volatile anesthetics in early life has consistently been found to result  
16 in widespread neuronal death in small mammal and non-human primate models(1).  
17 Vulnerability to anesthesia-associated cell death is confined to a temporal window  
18 coincident with high levels of brain growth and synaptogenesis(2). Human correlates of  
19 these processes suggest that vulnerability to injury for pediatric patients receiving  
20 anesthesia may extend into early childhood(3, 4). Neuronal injury by volatile anesthetics  
21 may be responsible for lasting behavioral and learning deficits in children exposed to  
22 the perioperative environment(5). The molecular pathways involved in neuronal death  
23 following exposure to volatile anesthetics in early life remain unclear.

24           Several prior observations have suggested that apoptosis may be the dominant  
25 mechanism of neuronal death following exposure to volatile anesthetics in the neonatal  
26 period. Anesthesia exposure alters the expression ratio of Bcl-2 family members in favor  
27 apoptosis through down-regulation of anti-apoptotic Bcl-2 and Bcl-x(L) and up regulation  
28 of pro-apoptotic Bax and Bad(2, 6-8). The morphology of affected neurons is consistent  
29 with apoptotic cell death(9). Finally, early life exposure to ethanol, which has a  
30 mechanism of action believed to be similar to volatile anesthetics, results in  
31 neuroapoptosis(10). These studies provide circumstantial evidence, but do not  
32 definitively demonstrate, that neuronal death following exposure to volatile anesthetics  
33 in early life occurs by apoptosis.

34           Vulnerability to anesthesia-associated death may not be uniform across all  
35 neuronal types. It has been suggested that GABAergic interneurons in superficial  
36 cortical layers may be overrepresented among the dying neurons(9). GABAergic

37 interneurons normally undergo significant cellular pruning by apoptosis during the same  
38 developmental window as vulnerability to anesthesia(16). Therefore, increased  
39 susceptibility to anesthesia may reflect an exacerbation of a normal physiological  
40 process. It is unknown how exposure to anesthesia impacts this normal physiological  
41 cell loss and what the consequences of neuron loss may be on neuronal circuit function.

42 Bax is activated by signaling events in cells undergoing apoptotic cell death(11).  
43 In neurons, genetic deletion of *Bax* is sufficient to block the apoptotic pathway in  
44 response to multiple stimuli, including trophic factor withdrawal, excitotoxic insult, and  
45 ethanol exposure(10, 12, 13). Blocking Bax activation is therefore a putative target to  
46 delineate neuronal death occurring through activation of the apoptotic pathway from  
47 other mechanisms of injury. Following early life exposure to ethanol, a  
48 neuroinflammatory response characterized by microglial activation occurs as a result of  
49 Bax-mediated apoptosis(14). A similar inflammatory profile following exposure to volatile  
50 anesthetics has been observed(15). However, it is unknown if the neuroinflammatory  
51 response to volatile anesthetics occurs as a consequence of neuronal death, or if it is  
52 an independent process that contributes to neuronal death.

53 In this study, we examined the mechanism of neurotoxicity and  
54 neuroinflammation following exposure to isoflurane in early life. We show that neuronal  
55 apoptosis following exposure to isoflurane requires Bax function, and that microglial  
56 activation is secondary to neuronal apoptosis. We profiled GABAergic neuron  
57 vulnerability to anesthesia-induced death, and probed for a disruption of global  
58 inhibitory-excitatory balance later in life. Finally, we sought to determine whether

59 neuronal loss due to neonatal exposure to anesthesia affected inhibitory-excitatory  
60 balance or cognitive function later in life.

61

## 62 **Materials and Methods**

### 63 **Animals and anesthetic exposure**

64 All procedures involving animals were approved by the Oregon Health & Science  
65 University Institutional Animal Care and Use Committee and conformed to the National  
66 Institutes of Health's *Guide for the Care and Use of Laboratory Animals*. Animals were  
67 allowed *ad lib* access to food and water and maintained in standard 12-hour light-dark  
68 cycle. Heterozygous *Bax* mice (B6.129X1-*Bax*<sup>tm1Sjk</sup>, stock #002994), *Bax*<sup>Flox</sup>;*Bak*<sup>-/-</sup>  
69 (B6;129-Bax<sup>tm2Sjk</sup> *Bak*<sup>tm1Thsn/J</sup>, stock #006329), *Rosa26*<sup>LSL-TdTomato</sup> (B6.Cg-  
70 Gt(ROSA)26Sortm9(CAG-tdTomato)Hze/J, stock #007909), and *Gad2-IRES-Cre*  
71 (*Gad2*<sup>tm2(cre)</sup>Zjh/J, stock #010802) were obtained from The Jackson Laboratory. A  
72 conditional GABAergic interneuron specific *Bax* knock-out/reporter line, *Gad2*<sup>IRES-</sup>  
73 *Cre*;*Bax*<sup>Flox</sup>; *Rosa26*<sup>TdTom/TdTom</sup>, was generated by interbreeding of *Bax*<sup>Flox</sup>;*Bak*<sup>-/-</sup>,  
74 *Rosa26*<sup>LSL-TdTomato</sup> and *Gad2-IRES-Cre*. This breeding strategy restored the *Bak* allele,  
75 so all mice were either *Bak*<sup>+/+</sup> or *Bak*<sup>+/-</sup>. Heterozygosity of the *Gad2* allele was preserved  
76 in the experimental population, as altered seizure threshold has been reported in  
77 homozygous *Gad2-IRES-Cre* animals(17). Proper recombination by the *Gad2-IRES-Cre*  
78 line was verified by expression of tdTomato specifically in GABAergic populations in all  
79 experimental animals.

80 On PND 7, neonatal mice were exposed to isoflurane partially titrated to a level  
81 of 1 MAC for 6 hours. At the beginning of the 12-hour light cycle animals were placed on

82 soft bedding in an acrylic induction chamber on circulating water bath heaters such that  
83 chamber temperature was maintained at 34°C. Humidity within the chamber was  
84 maintained with an open water bath placed near the common gas inlet. Carrier gas was  
85 composed of medical air and oxygen at an FiO<sub>2</sub> of 50% verified with a MaxO<sub>2</sub> ME  
86 oxygen sensor (MaxTec, Salt Lake City, UT) delivered at 1 LPM. Isoflurane  
87 concentration within the induction chamber was monitored using a POET II gas  
88 analyzer (Criticare Technologies, Inc, North Kingstown, RI) and sampling from the  
89 chamber exhaust port. Our experience and previous reports suggest that the potency of  
90 isoflurane increases with prolonged exposure in rodents, with resultant high levels of  
91 mortality during exposure without titration(18). For this reason the exposure paradigm  
92 used here was partially titrated to a level of 1 MAC guided by previous reports(19). At  
93 150 minutes of exposure responsiveness of the exposed population was assessed by  
94 toe pinch and it was found that ~50% of the exposed animals responded with movement  
95 following stimulation. This exposure paradigm was associated with a 1% mortality rate.  
96 Control littermates were maintained in similar conditions without isoflurane, all  
97 responded to toe pinch at 150 minutes and mortality rate was 0%. Arterial blood gas  
98 analysis was not performed due to institutional prohibitions against un-anesthetized  
99 terminal blood sampling. Following completion of the 6 hour exposure isoflurane  
100 administration was discontinued, carrier gas flow continued and mice were allowed to  
101 recover for 20 minutes following complete washout of isoflurane from the induction  
102 chamber. At the end of 20 minutes, responsiveness to toe pinch with vocalization and/or  
103 purposeful movement was confirmed and animals were returned to their home cage.  
104

105 **Genotype and sex determination**

106 DNA was extracted from tissue samples with Extracta DNA Prep kit (QuataBio,  
107 Beverly, MA) and PCR reactions were performed using genotype-specific primer sets.  
108 Sex was determined using primers directed towards the sex-associated gene *Ube1y1*  
109 as previously described(20).

110

111 **Neuroapoptosis assessment**

112 Animals were euthanized by rapid decapitation two hours after conclusion of the  
113 isoflurane exposure. Brains were isolated and preserved in 4% PFA for 16-24 hours at 4  
114 °C. 50 µm thick coronal sections from were cut on a Leica VT1200 Vibratome. Every  
115 fifth section from Paxinos plate P6 #25 to #34 was collected for analysis(21). For  
116 immunohistochemistry, free-floating sections were blocked and permeabilized with 2%  
117 donkey serum in 0.2% Triton X-100/PBS for four hours at room temperature, followed  
118 by antibody staining with 1:1000 anti-cleaved caspase-3 (Cell Signaling Technology)  
119 and subsequently 1:1000 anti-rabbit Alexa 568 (ThermoFisher) and 1:5000 Hoechst  
120 33342 (ThermoFisher). Sections were mounted on PermaFrost Plus slides  
121 (ThermoFisher), coated in FluoroMount-G (SouthernBiotech) and coverslipped. For  
122 Fluorojade C staining, sections were mounted to PermaFrost Plus slides and air dried  
123 for 24 hours. If not immediately processed, these slides were stored at -80 °C.  
124 Fluorojade C staining was carried out as previously described(22). Following staining  
125 sections were coated in DPX Mounting Media (SigmaAldrich) and coverslipped.  
126 Sections were imaged with a Zeiss Axio Imager M2 upright microscope equipped with

127 an ApoTome.2. Immunohistochemical analysis was performed using Fiji (NIH) by an  
128 observer blind to genotype and experimental conditions.

129

### 130 **Microglia activation assessment**

131 Microglia morphology, Iba1 content, and cytokine gene expression was  
132 determined following the initiation of the isoflurane exposure. For  
133 immunohistochemistry, brains were isolated and processed as described above 24  
134 hours following the initiation of isoflurane exposure. Iba1 containing cells were labeled  
135 by antibody staining with 1:500 anti-Iba1 (Wako #019-19741) and subsequently 1:1000  
136 anti-rabbit Alexa 568 and 1:5000 Hoechst 33342. Sections were imaged using a Zeiss  
137 Axio Imager M2 upright microscope equipped with an ApoTome.2 at low (10x)  
138 magnification. High magnification images were collected as a 0.5  $\mu\text{m}$  z-stack with a  
139 Nikon A1R confocal microscope with an optical magnification of 60x and digital  
140 magnification of 3.5x and images were processed as a projection through the stack  
141 using Fiji.

142 Cortical Iba1 content was determined by western blot 24 hours following the  
143 initiation of isoflurane exposure. Cortical hemispheres including the hippocampus were  
144 surgically isolated and snap frozen in liquid nitrogen and stored at -80 °C. Tissue was  
145 lysed in 2 ml of 20 mM Tris HCl pH 7.5, 150 mM NaCl, 1 mM EDTA, 1% Triton X-100  
146 and 1xHALT Protease and Phosphatase Inhibitor Cocktail (ThermoFisher) per  
147 hemisphere and processed with a dounce homogenizer. Insoluble material was  
148 removed by centrifugation (8000 xg for 15 minutes) and discarded. Protein  
149 concentration was determined with a Pierce BCA Protein Assay Kit (ThermoFisher) and



150 5 µg protein/sample were separated on 15% SDS-PAGE gels. Protein samples were  
151 transferred to PVDF membranes (ThermoFisher) and blocked in TBS Odyssey Blocking  
152 Buffer (Li-Cor). Membranes were probed with 1:2000 anti-Erk2 (Santa Cruz  
153 Biotechnology sc-1647), 1:1000 anti-Bax (CST D3R2M), and 1:500 anti-Iba1 (Wako  
154 #019-19741) followed by species-specific anti-IgG IR800CW or IR680CW secondary  
155 antibodies (Li-Cor). Samples were imaged using an Odyssey CLx system (Li-Cor).  
156 Band density quantification was performed using Fiji.

157 Markers of microglia activation and microglia-derived inflammatory cytokine  
158 expression were assessed by RT-PCR 12 hours after initiation of isoflurane exposure.  
159 Cortical hemispheres including the hippocampus were surgically isolated and RNA was  
160 isolated using an RNeasy Mini Kit (Qiagen). RNA concentration was determined using a  
161 NanoDrop (ThermoFisher), and 4 µg RNA was used for cDNA synthesis with a  
162 SuperScript III First-Strand Synthesis System using random hexamer primers  
163 (ThermoFisher). Template cDNA was diluted 1:5 in nuclease free H<sub>2</sub>O and stored at -20  
164 °C until PCR which was performed within 7 days. Uniplex qPCR was performed using  
165 TaqMan Fast Advanced Master Mix and FAM labeled primers (ThermoFisher) with a  
166 ViiA 7 System (Applied BioSystems). The UBE2D2 gene transcript was used as the  
167 internal reference, as it has previously been demonstrated to be relatively resistant to  
168 expression alteration in neurotoxic states(23).

169

### 170 **GABAergic interneuron quantification and selective protection**

171 PND 7 mice from *Gad2*<sup>IRE5-Cre/+</sup>; *Bax*<sup>Flox</sup>; *R26*<sup>TdTom/TdTom</sup> line were used to  
172 determine the relative cortical GABAergic interneuron population size by FACS.

173 Cortical hemispheres including the hippocampi were isolated in Hank's Buffered Salt  
174 Solution (HBSS) at 4°C and the meninges were removed. Hemispheres were then  
175 minced to ~1 mm<sup>3</sup> pieces and digested in 1ml of HBSS, 10 units papain (Roche), 5 mM  
176 L-cysteine, and 50 units DNase (Promega) for 15 minutes at 37 °C with agitation.  
177 Digestion was halted by the addition of 100 µl fetal bovine serum (ThermoFisher).  
178 Neurons were dissociated by trituration, and the cell suspension was then filtered  
179 through a 40 µm cell strainer. The cell suspension was then floated on top of 5 ml 20%  
180 Percoll (Sigma) in HBSS and centrifuged (800 xg for 5 minutes). The supernatant was  
181 discarded, and the pellet resuspended in 0.5 ml HBSS. TdTomato positive and negative  
182 neuron populations were counted and sorted by RFP fluorescence, forward scatter and  
183 side scatter gates using a Becton Dickinson InFlux cell sorter (OHSU Flow Cytometry  
184 Core). A sample of the FACS input cell suspension as well as the sorted cells were  
185 lysed with 100 µl/100K cells of the lysis buffer described above and subjected to 10%  
186 SDS-PAGE and western blot with 1:500 anti-RFP (Rockland 8E5.G7) and 1:1000 anti-  
187 Bax antibodies as described above.

188 To evaluate relative vulnerability of the GABAergic interneuron population versus  
189 the non-GABAergic interneuron population following exposure to isoflurane by  
190 immunohistochemistry, the *Gad2*<sup>IRES-Cre/+</sup>; *Bax*<sup>Flox/Flox</sup>, *R26*<sup>TdTom/TdTom</sup> and *Gad2*<sup>IRES-</sup>  
191 *Cre/+*; *Bax*<sup>Flox/+</sup>; *R26*<sup>TdTom/TdTom</sup> animals were exposed to isoflurane or control conditions as  
192 described above. Two hours after conclusion of the exposure, animals were euthanized  
193 and brains sections prepared as described above. Sections were stained with 1:500  
194 anti-RFP and 1:1000 anti-cleaved caspase 3. Cleaved caspase 3 positive neurons in

195 cortical layers II/III were counted and the proportion of GABAergic neurons (TdTomato  
196 positive) determined by an investigator blinded to the experimental conditions.

197

198

### 199 **Seizure susceptibility assay**

200 To investigate whether neonatal exposure to anesthesia influenced seizure  
201 susceptibility, we used a flurothyl exposure paradigm as previously described(24, 25).

202 *Gad2<sup>IRE5-Cre/+</sup>;Bax<sup>Flox/Flox</sup>; R26<sup>TdTom/TdTom</sup>* and *Gad2<sup>IRE5-Cre/+</sup>;Bax<sup>Flox/+</sup>; R26<sup>TdTom/TdTom</sup>*

203 animals were exposed to isoflurane or control conditions on PND7 as described above,

204 then returned to their home cages and allowed to age until undergoing seizure

205 susceptibility testing during post natal week (PNW) 7-8. Briefly, animals were placed in

206 an enclosed chamber with a physically isolated vaporization chamber. Liquid 10% Bis

207 (2,2,2-Trifluoroethyl) Ether in 85% EtOH/5% H2O solution was delivered to the

208 vaporization chamber at a rate of 100ul/min. Time to the onset of the first myoclonic jerk

209 and generalized tonic-clonic seizure (TCS) as evidenced by full body convulsant

210 movements with loss of postural control was recorded by an observer blind to the

211 experimental conditions. Verification of assay efficacy across genotype and isoflurane

212 treatment conditions was performed through repeated daily exposures for 7 days, which

213 was found to result in similar levels of kindling with reduced latency to TCS following

214 repeated exposures (data not shown). Immediately following onset of TCS the animals

215 were removed from the exposure chamber, resulting in spontaneous seizure cessation

216 within 5 seconds. Animals recovered to their baseline activity status over 5 minutes and

217 were then returned to their home cages.

218

219 **Behavioral Assays**

220       The long-term consequences on learning and memory following early life  
221 exposure to isoflurane were assessed. Animals were exposed to isoflurane on PND 7  
222 as described above and aged to PNW 10-11, at which time they underwent directed  
223 behavioral tests. Hippocampal-dependent visual-spatial learning and memory was  
224 assessed by Morris-Water-Maze (MWM) on PNW 10. Hippocampal-and amygdala-  
225 dependent contextual fear memory formation and amygdala-dependent cued fear  
226 memory were assessed on PNW 11.

227       MWM testing was performed generally as previously described(26). Mice were  
228 placed in a large water bath (122cm wide; 20 °C ± 1) surrounded by prominent visual  
229 cues and were removed upon locating the hidden platform (submerged 1cm under  
230 opaque water). The time taken to locate a hidden platform, the escape latency, was  
231 recorded. Mice that did not locate the platform within 60 seconds were gently guided to  
232 the platform and allowed to remain on it for 3 seconds before being removed. Each  
233 mouse received 4 trials per session with 10 minutes between each trial. Two sessions  
234 separated by 1 hour were conducted per day. After seven sessions, mice underwent a  
235 probe trial in which the hidden platform was removed. Time spent in each quadrant of  
236 the water bath was recorded. In addition, the cumulative distance the mice swam in  
237 search of the hidden platform was recorded.

238       Conditioned fear testing was used to assess fear-associated memory formation.  
239 On the first day of conditioned fear training, mice were placed in a novel fear  
240 conditioning chamber for 2 minutes and allowed to explore while baseline freezing time

241 was recorded. The mice were then exposed to a 30 second tone (80dB), which was  
242 immediately followed by a 0.4mA foot shock for 2 seconds. Two minutes later, the tone-  
243 shock pairing was delivered again. Ten seconds later, the mice were removed from the  
244 chamber and returned to their home cages. The following day, mice were placed into  
245 the same fear conditioning chamber and their mobility was recorded for 3 minutes in  
246 order to assess freezing behavior (cessation of all movement except for respiration). No  
247 tones or shocks were delivered. One hour later mice were placed in a novel chamber  
248 and the same conditioned fear tone was delivered 3 minutes later. Freezing behavior  
249 was recorded during the three minutes prior to exposure to the fear tone and for the  
250 three minute period following exposure to the tone.

251

## 252 **Statistical analysis**

253 Simultaneous comparison of neuron death among the genotypes and conditions  
254 tested was preformed by two-tailed Dunnett's test using the statistical software R. Gene  
255 expression was quantified using the comparative  $C_T$  method in QuantStudio 6 and  
256 expressed and mean  $\pm$  95% confidence interval. A three way repeated measures  
257 ANOVA was used to determine potential group differences in the learning acquisition of  
258 the water maze test with sessions as the within subject factors and genotype and  
259 isoflurane exposure as the between subject factors. A one way ANOVA was preformed  
260 for the MWM probe trial to assess within group differences between the target quadrant  
261 versus the non-target quadrants with the statistical software SPSS. Intergroup  
262 differences in the cumulative distance swam away from the center of the target platform  
263 was assessed by two-way t-test using R.

264 **Results**

265 **Bax is necessary for neuronal death following neonatal exposure to anesthesia**

266       Neuronal death associated with ethanol exposure in early life occurs primarily via  
267 apoptosis, and is blocked by genetic deletion of Bax(10). We therefore sought to test  
268 the hypothesis that neonatal exposure to isoflurane induces cell death through  
269 apoptosis. We developed an exposure paradigm that partially titrates isoflurane delivery  
270 to a level of 1 MAC over a 6 hour period (Fig 1A). Animals tolerated this exposure well,  
271 with a low mortality rate and rapid recovery to baseline activity following completion of  
272 the exposure period. Two hours following completion of the exposure, control and  
273 isoflurane treated animals were indistinguishable based on appearance and activity  
274 level. At this point, animals were euthanized, and brains were assessed by  
275 immunohistochemistry using cleaved caspase-3 as a marker of apoptotic cell death (Fig  
276 1B). We found that in wild-type animals exposed to isoflurane treatment, cleaved  
277 caspase-3 containing neurons were readily detectable throughout the brain. Consistent  
278 with previous descriptions, the distribution of cleaved caspase-3 neurons was higher in  
279 the superficial cortex and in layer V(9, 27). Assessment of cell death in wild-type  
280 animals using an unbiased marker of dead and degenerating neurons, FluoroJade C,  
281 revealed a pattern of neuronal death similar to that seen with cleaved caspase-3 (Fig  
282 1C). The number of apoptotic cells was quantified by counting the number of cleaved  
283 caspase-3 positive cells with neuronal morphology within a region of interest that  
284 included the cortex and hippocampus (Fig 1D). This analysis revealed that isoflurane  
285 exposure results in a 5-fold increase in cleaved caspase-3 positive neurons compared  
286 to control treated wild-type animals (Fig 1E).

287 In contrast to wild-type mice, *Bax* deficiency afforded protection from apoptotic  
288 cell death following exposure to anesthesia in a gene-dose dependent manner (Fig 1B-  
289 E). *Bax*<sup>+/-</sup> mice had significantly fewer cleaved caspase-3 positive neurons following  
290 exposure to isoflurane than wild-type mice, (Fig. 1E). Constitutive deletion of *Bax*  
291 resulted in a nearly complete elimination of cleaved caspase-3 positive neurons  
292 following exposure to isoflurane. Cleaved caspase-3 staining was also lower in  
293 untreated *Bax*<sup>-/-</sup> animals compared to untreated wild-type and *Bax*<sup>+/-</sup> animals, reflecting  
294 inhibition of normal developmental apoptotic cellular pruning. Taken together, these  
295 results show that neuronal death following neonatal exposure to isoflurane occurs via  
296 *Bax*-dependent apoptosis.

297

298 ***Fig 1. Neuronal death occurs in neonatal animals exposed to isoflurane. A)***

299 *Diagram of the experimental isoflurane exposure paradigm. On PND 7 mice were*

300 *exposed to isoflurane titrated to a level of 1 MAC over the duration of the exposure. The*

301 *time mice were exposed to each concentration of isoflurane is shown. B) Coronal*

302 *sections approximate to Paxinos plate P6 #30 from *Bax*<sup>+/+</sup> and *Bax*<sup>-/-</sup> animals exposed to*

303 *isoflurane and probed for cleaved caspase-3. C) Coronal sections similar to (B), but*

304 *stained with Fluorojade C reveals dye accumulation in neurons in the exposed *Bax*<sup>+/+</sup>*

305 *animals, but not in *Bax*<sup>-/-</sup> animals. D) Representative brain section labeled for cleaved*

306 *caspase-3 indicating the region of interest (dashed line) where cleaved caspase-3*

307 *positive neuron profiles was counted. Magnifications of boxed regions are shown below*

308 *(hippocampus) and to the right (cortex). E) Quantification of cleaved caspase-3 neurons*

309 *in the cortex and hippocampus.*

310 **Neuroinflammation occurs as a consequence of Bax-mediated neuronal**  
311 **apoptosis**

312 Neuroinflammation has been described following exposure to volatile anesthetic  
313 exposure in the neonatal period, and it has been proposed that inflammation itself  
314 contributes to cognitive deficits later in life(15). We therefore tested whether  
315 neuroinflammation occurs as a consequence on neuronal death, or is an independent  
316 process. We found that following exposure to isoflurane, Iba1<sup>+</sup> microglia in the  
317 hippocampus (Fig 2A) and cortex (Fig 2B) of wild-type mice undergo a clear change in  
318 morphology. Microglia processes appear to retract around the soma, changing from a  
319 ramified morphology to an ameboid morphology consistent with their activation(28). In  
320 contrast, in *Bax*<sup>-/-</sup> animals, in which neuronal apoptosis is blocked, microglia retain their  
321 ramified morphology following exposure to isoflurane. In contrast to the change in  
322 microglial morphology, the levels of Iba1 protein does not change in wild-type or *Bax*<sup>-/-</sup>  
323 mice following exposure to isoflurane (Fig 2C).

324 We also assessed microglial activation by quantifying the expression of the  
325 microglia-derived pro-inflammatory cytokines *TNF $\alpha$*  and *IL-1 $\beta$* , as well as *CR3/MAC-1*  
326  *$\beta$ 2-integrin subunit (*Itg $\beta$ 2*)* and *P2Y12*, which are up- and down-regulated, respectively,  
327 during microglia activation. As expected, the expression of *TNF $\alpha$* , *IL-1 $\beta$* , and *Itg $\beta$ 2* are  
328 all increased in wild-type mice following exposure to isoflurane, while *P2Y12* expression  
329 is decreased (Fig 2D). In contrast, the expression profile of microglia-activation  
330 associated genes is attenuated in *Bax*<sup>-/-</sup> animals following isoflurane exposure (Fig 2D).  
331 These results demonstrate that microglial activation occurs downstream of Bax-  
332 mediated neuron apoptosis following neonatal exposure to anesthesia.



333

334 **Fig 2. Neuroinflammation following neonatal exposure to isoflurane is a**  
335 **consequence of neuronal apoptosis.** A) Low magnification images of hippocampal  
336 microglia and high magnification images taken in the molecular layer in the CA1 region  
337 (inset). B) Microglia imaged throughout the cortex. Approximate position of cortical  
338 layers II, IV and the corpus callosum (CC) are shown. C) Western blot analysis of Erk,  
339 Bax and Iba1 content in cortical lysate and quantification by band densitometry. D)  
340 qPCR analysis of the relative expression of microglia-derived pro-inflammatory  
341 cytokines and microglial activation genes, mean  $\pm$  95% confidence intervals are shown.

342

### 343 **GABAergic neurons are vulnerable to isoflurane-induced death**

344 GABAergic neurons represent ~15% of the total cortical neuron population in  
345 adult rodents. The final population of GABAergic neurons is regulated by a wave of Bax-  
346 dependent apoptosis during the early postnatal period, which overlaps with the period of  
347 vulnerability to volatile anesthetic toxicity(16, 29). Previous studies have suggested that  
348 cortical GABAergic interneurons may be overrepresented among dead cells following  
349 exposure to anesthesia(9, 30). This raises the possibility that an increase in GABAergic  
350 neuron death following exposure to anesthesia occurs due to an amplification of the  
351 normal wave of developmental apoptosis.

352 To test this, we first quantified the proportion of GABAergic neurons within the  
353 cleaved caspase-3 positive population following exposure to isoflurane. To identify  
354 GABAergic neurons, we used a genetic approach by generating a conditional  
355 knockout/reporter line, *Gad2-IRES<sup>Cre</sup>;Bax<sup>Flox</sup>;R26<sup>TdTom</sup>/TdTom*. At PND7, the relative

356 proportion of tdTomato+ GABAergic interneurons was ~16-17% of the cortical neuron  
357 population based on FACS (Fig 3A). Consistent with previous reports, deletion of *Bax*  
358 did not affect overall interneuron numbers at P7, as the majority of developmental  
359 GABAergic neuron apoptosis occurs between P7-P11 (16). We observed cleaved  
360 caspase-3 staining in both GABAergic (tdTomato+) and non-GABAergic (tdTomato-)  
361 neurons in control *Gad2-IRES<sup>Cre</sup>;Bax<sup>Flox/+</sup>;R26<sup>TdTom/TdTom</sup>* mice (Fig 3B). Quantification  
362 revealed that ~30% of the cleaved caspase-3 neurons were tdTomato+ GABAergic  
363 neurons (Fig 3C). Therefore, GABAergic neurons were overrepresented approximately  
364 two-fold in the population of neurons undergoing apoptosis following exposure to  
365 anesthesia. Conditional deletion of *Bax* selectively from interneurons (*Gad2-*  
366 *IRES<sup>Cre</sup>;Bax<sup>Flox/Flox</sup>;R26<sup>TdTom/TdTom</sup>*) resulted in a 50% reduction in the proportion of  
367 GABAergic neurons undergoing apoptosis to ~15%. Based our results using  
368 constitutive *Bax<sup>-/-</sup>* mice (Figure 1), we had anticipated complete protection of  
369 interneurons from anesthesia-associated death in these mice. However, when we  
370 assessed the degree of *Bax* deletion in *Gad2-IRES<sup>Cre</sup>;Bax<sup>Flox/Flox</sup>;R26<sup>TdTom/TdTom</sup>* animals,  
371 we found that Bax protein in interneurons was reduced, but not eliminated (Fig 3D). This  
372 suggests that despite the *Gad2* promoter driving recombination at ~E19(31), there was  
373 still residual Bax protein at PND7, possibly due to slow protein turnover. Regardless,  
374 even incomplete elimination of Bax protein resulted in significant protection from  
375 isoflurane-induced apoptosis in GABAergic neurons.

376

377 **Fig 3. GABAergic interneurons show increased vulnerability to isoflurane-**

378 **induced apoptosis.** A) Cortical interneurons from the *Gad2-IRES<sup>Cre</sup>;Bax<sup>Flox</sup>;R26<sup>TdTom/TdTom</sup>*

379 *were counted by FACS based on TdTomato fluorescence and side scatter.*  
380 *Demarcation of the GABAergic and nonGABAergic neuron populations for counting is*  
381 *shown as the dashed line. Solid trapazoids are representative of the collection gates*  
382 *used for sorting the cell populations used for subsequent western blot analysis in (D).*  
383 *Three animals per genotype from three separate litters were used for this analysis. B)*  
384 *Representative images of cleaved caspase-3 positive non-GABAergic (top) and*  
385 *GABAergic (bottom) neurons following exposure to isoflurane. C) Quantification of the*  
386 *relative proportion of non-GABAergic and GABAergic neurons in the total cleaved*  
387 *caspase-3 positive population in cortical layers II/III. D) Western blot analysis of input*  
388 *and the isolated populations following FACS with quantification of the relative Bax levels*  
389 *in the TdTomato positive population by band densitometry.*

390

### 391 **Selective protection of GABAergic neurons alters seizure susceptibility**

392       Prior work suggests that exposure to volatile anesthetics may result in lasting  
393 alteration of seizure susceptibility. First, volatile anesthetics cause epileptic discharge-  
394 like activity when delivered in sub-burst suppression doses(32, 33). Furthermore, over  
395 activation of microglia during early development is known to enhance epileptogenicity of  
396 neurotoxic insults(34). Finally, disruption of the excitatory:inhibitory (E:I) ratio through  
397 loss of GABAergic interneurons correlates with epilepsy severity(35). Given our  
398 observations that isoflurane exposure activates microglia and that GABAergic neurons  
399 are overrepresented among cleaved caspase-3 positive neurons, we tested whether the  
400 mice exposed to isoflurane as neonates showed altered seizure susceptibility as adults.

401 We also asked whether selectively reducing inhibitory neuron death in *Gad2-*  
402 *IRES<sup>Cre/+</sup>;Bax<sup>Flox/Flox</sup>* mice offered protection from seizure susceptibility.

403 We induced seizures with exposure to Bis-(2,2,2-Trifluoroethyl)-Ether (Flurothyl)  
404 due to its ease of administration, demonstrated consistency, and rapid recovery from  
405 seizure following cessation of exposure(24, 25). Latency to the onset of the first  
406 myoclonic jerk following exposure to Flurothyl was not statistically different between  
407 control and isoflurane exposed groups in either *Gad2-IRES<sup>Cre/+</sup>;Bax<sup>Flox/+</sup>* or *Gad2-*  
408 *IRES<sup>Cre/+</sup>;Bax<sup>Flox/Flox</sup>* (Fig 4A). Similar to the results seen with latency to the first  
409 myoclonic jerk, control *Gad2-IRES<sup>Cre/+</sup>;Bax<sup>Flox/+</sup>* mice exposed to isofluane did not  
410 display any difference in latency to tonic-clonic seizure (TCS). Surprisingly, isoflurane  
411 exposed *Gad2-IRES<sup>Cre/+</sup>;Bax<sup>Flox/Flox</sup>* mice demonstrated consistent protection from TCS  
412 induction (Fig 4B). Taken together, these results suggest that the increased neuron  
413 apoptosis and neuroinflammation observed following early life exposure to isoflurane  
414 does not alter susceptibility to seizures later in life.

415

416 ***Fig 4. Early life exposure to isoflurane does not affect seizure susceptibility. A)***

417 *Latency to the onset of the first myoclonic jerk following the initiation of the exposure to*

418 *Fluothyl. B) Latency to the onset of TCS with loss of postural control.*

419

420 **Assessment of learning and memory following isoflurane exposure in early life**

421 We found that exposure to isoflurane early in life induced neuronal apoptosis and  
422 neuroinflammation, which could be blocked by constitutive deletion of *Bax*. Therefore,  
423 we tested whether neonatal exposure to isoflurane causes cognitive defects later in life,

424 and whether blocking neuronal apoptosis in this context provides protection. We used  
425 the Morris Water Maze (MWM) test to assess deficits in hippocampal-dependent visual-  
426 spatial memory formation following early life exposure to anesthesia(1). There was no  
427 effect on the escape latency during the training period when comparing controls and  
428 mice exposed to isoflurane in the  $Bax^{+/+}$ ,  $Bax^{+/-}$ , and  $Bax^{-/-}$  groups (Fig 5A).  
429 Unexpectedly, unexposed  $Bax^{-/-}$  animals showed an increase in escape latency  
430 compared to unexposed  $Bax^{+/+}$  animals through the first six training sessions. A probe  
431 trial was performed 24 hours following the training sessions to assess memory retention  
432 and recall (Fig 5B). All genetic and treatment conditions displayed place preference for  
433 the quadrant formerly containing the hidden platform (the target quadrant). We  
434 assessed potential group differences in the memory retention and recall process by  
435 evaluating cumulative distance the animal swam from the center point of the hidden  
436 platform (Fig 5C). There was no difference between control and isoflurane exposed  
437 animals within each genotype group. However, a significant difference between the  
438  $Bax^{+/+}$  and  $Bax^{-/-}$  groups was observed, with  $Bax^{-/-}$  animals swimming a greater  
439 cumulative distance.

440

441 ***Fig 5. Hippocampal-dependent visual spatial memory is unaffected by early life***  
442 ***exposure to isoflurane.*** A) *Learning curves on repeated training sessions in the*  
443 *Morris Water Maze, group sizes are as indicated in (B).* B) *Place preference assessed*  
444 *as percent time spent in each quadrant of the maze over the 60 seconds of the probe*  
445 *trial in which the escape platform was removed and the visual cues remained*

446 *unchanged. C) Cumulative distance the animal swam from where the platform was*  
447 *originally located.*

448

449 In addition to the MWM, fear conditioning assays have been used extensively to  
450 evaluate cognitive deficits in rodents exposed to volatile anesthetics in early life(1). We  
451 used a standard training regime and tested control and isoflurane-exposed  $Bax^{+/-}$ ,  $Bax^{+/-}$   
452 and  $Bax^{-/-}$  mice 24 hours later for contextual and cued fear behavior. During the training  
453 period, we observed no differences in freezing time or mobility among the animals for  
454 the first two minutes the subjects were in the novel fear conditioning chamber prior to  
455 exposure to noxious auditory or electrical stimuli (Fig 6A). One day following training,  
456 we assessed contextual fear memory and observed no difference between control and  
457 isoflurane exposed animals within each genotype group (Fig 6B). However, similar to  
458 the MWM test,  $Bax^{-/-}$  mice from the control group exhibited a weaker memory,  
459 characterized by less freezing time. Cued fear memory displayed a similar pattern (Fig  
460 6C). Although the  $Bax^{-/-}$  mice did not show a significant increase in freezing upon re-  
461 exposure to the tone that was previously associated with the shock, there were no  
462 significant interactions between genotype and treatment to suggest that this was  
463 independent of its genotype deficit.

464 Collectively, these results show that early life exposure to isoflurane did not result  
465 in deficits in hippocampal-dependent visual spatial memory formation or  
466 hippocampal/amygdala-dependent fear conditioning. Interestingly, we did observe  
467 defects in  $Bax^{-/-}$  mice in the control groups, suggesting that interfering with normal  
468 developmental apoptosis resulted in memory-related cognitive deficits.

469

470

471 **Fig 6. Hippocampal/Amygdala-dependent fear conditioning is unaffected by early**

472 **life exposure to isoflurane.** A) Baseline freezing time assessed during the first

473 exposure to the fear conditioning chamber prior to exposure to noxious stimuli. B) 24

474 hours after training, mice were returned to the fear conditioning chamber and freezing

475 time over a 3 minute observation period was assessed. Comparison between the *Bax*<sup>+/+</sup>

476 and *Bax*<sup>-/-</sup> groups that were significant are indicated. C) One hour after contextual fear

477 assessment, mice were placed in a novel chamber and exposed to the auditory tone

478 heard during training. Freezing time prior to exposure and following the tone was

479 assessed.

480

## 481 Discussion

482

483 Previous studies have indicated that in addition to neuronal death, exposure to

484 anesthetic agents in the neonatal period results in disrupted synapse architecture,

485 altered mitochondrial morphology and increased axonal pruning(36-38). We attempted

486 to delineate the contribution of neuronal apoptosis from other potentially injurious effects

487 associated with exposure to volatile anesthetics in the neonatal period using *Bax*

488 knockout mice. We found that *Bax* is essential for isoflurane-induced neuronal death, as

489 *Bax*<sup>-/-</sup> mice displayed no evidence of apoptotic or dead/degenerating neurons following

490 exposure to isoflurane at PND7.

491 Neuroinflammation has been described in adult models of anesthesia exposure,

492 but has not been assessed in neonatal models(39). We therefore investigated whether

493 neuroinflammation occurs following early life exposure to isoflurane, and whether it

494 occurs independent of neuronal death using *Bax* knockout mice. In control mice, there  
495 were clear changes in microglial morphology consistent with their activation immediately  
496 following exposure to isoflurane. This was accompanied by changes in pro-inflammatory  
497 cytokines associated with microglial activation. This inflammatory response was  
498 dependent on neuronal apoptosis, as it was attenuated in *Bax* knockout mice.  
499 This suggests that during the neonatal period, volatile anesthetics are not a strong  
500 proinflammatory stimuli themselves, but rather neuronal apoptosis is the primary stimuli  
501 which induces microglial activation. This is similar to the injury and response pattern  
502 observed with early life exposure to ethanol(14).

503 *Bax*-dependent cellular pruning is a normal part of neurological development,  
504 and GABAergic neurons undergo extensive apoptotic cellular pruning during the first  
505 two weeks of post-natal life(16). Cortical GABAergic interneurons are also thought to be  
506 particularly vulnerable to volatile anesthetic associated death in the neonatal period(30).  
507 Indeed, we found that GABAergic interneurons are overrepresented within the apoptotic  
508 population following exposure to isoflurane. We predicted that excessive interneuron  
509 apoptosis could potentially lead to disruptions in E:I balance and increased susceptibility  
510 to seizures. Supporting this hypothesis, epileptogenic-like EEG has been observed as a  
511 consequence of early life exposure to volatile anesthetics(40, 41). However, we found  
512 no decrease in seizure threshold associated with early life exposure to volatile  
513 anesthetics in control genotype mice. One potential explanation for this unexpected  
514 result is that the acute increase in GABAergic neuronal apoptosis immediately following  
515 exposure to isoflurane at P7 is balanced by a reduction of GABAergic apoptosis in the  
516 later stages of normal development (P10-P14), resulting in an overall preservation of



517 GABAergic neuron numbers. Alternatively, overall numbers of GABAergic neurons may  
518 be decreased following early life exposure to isoflurane, with the remaining GABAergic  
519 neurons scaling their inhibitory inputs to maintain a normal E:I balance. We should also  
520 note that our study differed from previous work in the anesthetic used (sevoflurane vs  
521 isoflurane), which may account for the different results(41). Surprisingly, we did find that  
522 *Gad2-IRES<sup>Cre/+</sup>;Bax<sup>Flox/Flox</sup>* mice had increased seizure threshold in isoflurane exposed  
523 mice, suggesting that selective protection of GABAergic neurons from volatile  
524 anesthetic associated death results in alterations of the global E:I ratio.

525 We also investigated whether neuronal apoptosis and neuroinflammation  
526 following early life exposure to volatile anesthetics had lasting consequences on  
527 cognitive function later in life. We found no significant differences between controls and  
528 isoflurane-exposed wild-type animals in the MWM or fear conditioning assays,  
529 suggesting that early life exposure does not affect cognitive function. To our surprise,  
530 we found that *Bax* deficiency itself led to deficits in multiple aspects of cognition,  
531 independent of volatile anesthetic exposure. Previous studies have described *Bax*  
532 knockout mice as having persistently prolonged escape latency in MWM training  
533 sessions when visual spatial learning was assessed(42, 43). The deficits we observed  
534 suggest that normal *Bax*-mediated developmental apoptosis in early life is critical for  
535 cognitive development. Cellular pruning, synapse remodeling, and axon pruning are all  
536 mediated by *Bax*-dependent caspase activation, and disruption of any or all of these  
537 processes could give rise to negative effects on cognitive development(16, 44, 45). We  
538 cannot exclude the possibility that the lack of cognitive deficits in wild-type animals  
539 exposed to isoflurane treatment in early life is due to specific aspects of the study

540 design. However, if the neuronal apoptosis and neuroinflammation attributable to  
541 volatile anesthetic exposure in early life does contribute to cognitive defects later in life,  
542 it is relatively mild when compared to the effect that blocking normal developmental  
543 caspase activation with *Bax* deficiency has on cognitive development.

544 In conclusion we have demonstrated that *Bax* is necessary for neuronal death  
545 associated with early life exposure to volatile anesthetics. The neuroinflammation seen  
546 following volatile anesthetic exposure in the neonatal period likely arises as a secondary  
547 consequence of *Bax*-mediated neuronal apoptosis rather than being an independent  
548 response to volatile anesthetic exposure. And finally, GABAergic interneurons are  
549 overrepresented among the dead neurons, suggesting they are more susceptible to the  
550 pro-apoptotic effects of volatile anesthesia. Due to the cognitive deficits attributable to  
551 *Bax* deficiency alone, we were unable to conclusively determine whether blocking  
552 apoptosis and neuroinflammation following volatile anesthetic exposure provided any  
553 benefit with respect to cognitive function. Establishing a transient protected state  
554 through the use of *Bax*- or caspase-specific small molecule inhibitors may prove to be a  
555 viable alternative approach for investigating lasting consequences of early life exposure  
556 to volatile anesthetics. Further investigation along these lines will be necessary to  
557 delineate the contribution of neuronal death from other disruptions in neuronal function  
558 to the injury arising from early life exposure to volatile anesthetics.

559

## 560 **Acknowledgements**

561 The authors would like to thank Kylee Rosette for technical assistance with mouse  
562 colony maintenance and Mike Jacobson for technical assistance with behavioral

563 assays. This work was supported by FAER Research Fellowship Grant (RFG-02-15-  
564 17) to AMS and NIH Grant (R01 NS091027) to KMW.

## References

1. Walters JL, Paule MG. Review of preclinical studies on pediatric general anesthesia-induced developmental neurotoxicity. *Neurotoxicol Teratol*. 2017;60:2-23.
2. Yon JH, Daniel-Johnson J, Carter LB, Jevtovic-Todorovic V. Anesthesia induces neuronal cell death in the developing rat brain via the intrinsic and extrinsic apoptotic pathways. *Neuroscience*. 2005;135(3):815-27.
3. Schenning KJ, Noguchi KK, Martin LD, Manzella FM, Cabrera OH, Dissen GA, et al. Isoflurane exposure leads to apoptosis of neurons and oligodendrocytes in 20- and 40-day old rhesus macaques. *Neurotoxicology and Teratology*. 2017;60:63-8.
4. Jevtovic-Todorovic V. Exposure of Developing Brain to General Anesthesia: What Is the Animal Evidence? *Anesthesiology*. 2018;128(4):832-9.
5. Warner DO, Shi Y, Flick RP. Anesthesia and Neurodevelopment in Children: Perhaps the End of the Beginning. *Anesthesiology*. 2018;128(4):700-3.
6. Zhang Y, Dong Y, Wu X, Lu Y, Xu Z, Knapp A, et al. The mitochondrial pathway of anesthetic isoflurane-induced apoptosis. *J Biol Chem*. 2010;285(6):4025-37.
7. Li Y, Zeng M, Chen W, Liu C, Wang F, Han X, et al. Dexmedetomidine Reduces Isoflurane-Induced Neuroapoptosis Partly by Preserving PI3K/Akt Pathway in the Hippocampus of Neonatal Rats. *PLOS ONE*. 2014;9(4):e93639.
8. Yan H, Xu T, Zhao H, Lee KC, Wang HY, Zhang Y. Isoflurane increases neuronal cell death vulnerability by downregulating miR-214. *PLoS One*. 2013;8(2):e55276.
9. Brambrink AM, Evers AS, Avidan MS, Farber NB, Smith DJ, Zhang X, et al. Isoflurane-induced neuroapoptosis in the neonatal rhesus macaque brain. *Anesthesiology*. 2010;112(4):834-41.
10. Young C, Klocke BJ, Tenkova T, Choi J, Labruyere J, Qin YQ, et al. Ethanol-induced neuronal apoptosis in vivo requires BAX in the developing mouse brain. *Cell death and differentiation*. 2003;10(10):1148-55.
11. Schafer ZT, Kornbluth S. The Apoptosome: Physiological, Developmental, and Pathological Modes of Regulation. *Developmental Cell*. 2006;10(5):549-61.

12. Deckwerth TL, Elliott JL, Knudson CM, Johnson EM, Jr., Snider WD, Korsmeyer SJ. BAX is required for neuronal death after trophic factor deprivation and during development. *Neuron*. 1996;17(3):401-11.
13. Xiang H, Kinoshita Y, Knudson CM, Korsmeyer SJ, Schwartzkroin PA, Morrison RS. Bax involvement in p53-mediated neuronal cell death. *J Neurosci*. 1998;18(4):1363-73.
14. Ahlers KE, Karacay B, Fuller L, Bonthius DJ, Dailey ME. Transient activation of microglia following acute alcohol exposure in developing mouse neocortex is primarily driven by BAX-dependent neurodegeneration. *Glia*. 2015;63(10):1694-713.
15. Shen X, Dong Y, Xu Z, Wang H, Miao C, Soriano SG, et al. Selective anesthesia-induced neuroinflammation in developing mouse brain and cognitive impairment. *Anesthesiology*. 2013;118(3):502-15.
16. Southwell DG, Paredes MF, Galvao RP, Jones DL, Froemke RC, Sebe JY, et al. Intrinsically determined cell death of developing cortical interneurons. *Nature*. 2012;491(7422):109-13.
17. Lee V, Maguire J. Impact of inhibitory constraint of interneurons on neuronal excitability. *Journal of neurophysiology*. 2013;110(11):2520-35.
18. Loepke AW, Istaphanous GK, McAuliffe JJ, 3rd, Miles L, Hughes EA, McCann JC, et al. The effects of neonatal isoflurane exposure in mice on brain cell viability, adult behavior, learning, and memory. *Anesth Analg*. 2009;108(1):90-104.
19. Lee BH, Chan JT, Hazarika O, Vutskits L, Sall JW. Early exposure to volatile anesthetics impairs long-term associative learning and recognition memory. *PLoS One*. 2014;9(8):e105340.
20. McFarlane L, Truong V, Palmer JS, Wilhelm D. Novel PCR assay for determining the genetic sex of mice. *Sex Dev*. 2013;7(4):207-11.
21. Paxinos G. Atlas of the developing mouse brain at E17.5, P0 and P6. 1st ed. Amsterdam ; Boston: Elsevier; 2007. xi, 353 p. p.
22. Ebara A, Ueda S. Application of Fluoro-Jade C in acute and chronic neurodegeneration models: utilities and staining differences. *Acta Histochem Cytochem*. 2009;42(6):171-9.
23. Rydbirk R, Folke J, Winge K, Aznar S, Pakkenberg B, Brudek T. Assessment of brain reference genes for RT-qPCR studies in neurodegenerative diseases. *Sci Rep*. 2016;6:37116.

24. Papandrea D, Anderson TM, Herron BJ, Ferland RJ. Dissociation of seizure traits in inbred strains of mice using the flurothyl kindling model of epileptogenesis. *Exp Neurol*. 2009;215(1):60-8.
25. Ferland RJ. The Repeated Flurothyl Seizure Model in Mice. *Bio Protoc*. 2017;7(11).
26. Morris R. Developments of a water-maze procedure for studying spatial learning in the rat. *Journal of neuroscience methods*. 1984;11(1):47-60.
27. Istaphanous GK, Ward CG, Nan X, Hughes EA, McCann JC, McAuliffe JJ, et al. Characterization and quantification of isoflurane-induced developmental apoptotic cell death in mouse cerebral cortex. *Anesth Analg*. 2013;116(4):845-54.
28. Beynon SB, Walker FR. Microglial activation in the injured and healthy brain: what are we really talking about? Practical and theoretical issues associated with the measurement of changes in microglial morphology. *Neuroscience*. 2012;225:162-71.
29. Meinecke DL, Peters A. GABA immunoreactive neurons in rat visual cortex. *J Comp Neurol*. 1987;261(3):388-404.
30. Zhou ZW, Shu Y, Li M, Guo X, Pac-Soo C, Maze M, et al. The glutaminergic, GABAergic, dopaminergic but not cholinergic neurons are susceptible to anaesthesia-induced cell death in the rat developing brain. *Neuroscience*. 2011;174:64-70.
31. Taniguchi H, He M, Wu P, Kim S, Paik R, Sugino K, et al. A resource of Cre driver lines for genetic targeting of GABAergic neurons in cerebral cortex. *Neuron*. 2011;71(6):995-1013.
32. Iijima T, Nakamura Z, Iwao Y, Sankawa H. The epileptogenic properties of the volatile anesthetics sevoflurane and isoflurane in patients with epilepsy. *Anesth Analg*. 2000;91(4):989-95.
33. Voss LJ, Sleight JW, Barnard JP, Kirsch HE. The howling cortex: seizures and general anesthetic drugs. *Anesth Analg*. 2008;107(5):1689-703.
34. Kim I, Mlsna LM, Yoon S, Le B, Yu S, Xu D, et al. A postnatal peak in microglial development in the mouse hippocampus is correlated with heightened sensitivity to seizure triggers. *Brain Behav*. 2015;5(12):e00403.
35. Buckmaster PS, Abrams E, Wen X. Seizure frequency correlates with loss of dentate gyrus GABAergic neurons in a mouse model of temporal lobe epilepsy. *Journal of Comparative Neurology*. 2017;525(11):2592-610.

36. Boscolo A, Milanovic D, Starr JA, Sanchez V, Oklopcic A, Moy L, et al. Early exposure to general anesthesia disturbs mitochondrial fission and fusion in the developing rat brain. *Anesthesiology*. 2013;118(5):1086-97.
37. Amrock LG, Starner ML, Murphy KL, Baxter MG. Long-term effects of single or multiple neonatal sevoflurane exposures on rat hippocampal ultrastructure. *Anesthesiology*. 2015;122(1):87-95.
38. Obradovic AL, Atluri N, Dalla Massara L, Oklopcic A, Todorovic NS, Katta G, et al. Early Exposure to Ketamine Impairs Axonal Pruning in Developing Mouse Hippocampus. *Mol Neurobiol*. 2017.
39. Jackson WM, Gray CD, Jiang D, Schaefer ML, Connor C, Mintz CD. Molecular Mechanisms of Anesthetic Neurotoxicity: A Review of the Current Literature. *J Neurosurg Anesthesiol*. 2016;28(4):361-72.
40. Edwards DA, Shah HP, Cao W, Gravenstein N, Seubert CN, Martyniuk AE. Bumetanide alleviates epileptogenic and neurotoxic effects of sevoflurane in neonatal rat brain. *Anesthesiology*. 2010;112(3):567-75.
41. Seubert CN, Zhu W, Pavlinec C, Gravenstein N, Martyniuk AE. Developmental effects of neonatal isoflurane and sevoflurane exposure in rats. *Anesthesiology*. 2013;119(2):358-64.
42. Tehranian R, Rose ME, Vagni V, Pickrell AM, Griffith RP, Liu H, et al. Disruption of Bax protein prevents neuronal cell death but produces cognitive impairment in mice following traumatic brain injury. *J Neurotrauma*. 2008;25(7):755-67.
43. Lee JW, Kim WR, Sun W, Jung MW. Role of dentate gyrus in aligning internal spatial map to external landmark. *Learn Mem*. 2009;16(9):530-6.
44. Li Z, Jo J, Jia JM, Lo SC, Whitcomb DJ, Jiao S, et al. Caspase-3 activation via mitochondria is required for long-term depression and AMPA receptor internalization. *Cell*. 2010;141(5):859-71.
45. Simon DJ, Weimer RM, McLaughlin T, Kallop D, Stanger K, Yang J, et al. A caspase cascade regulating developmental axon degeneration. *J Neurosci*. 2012;32(49):17540-53.

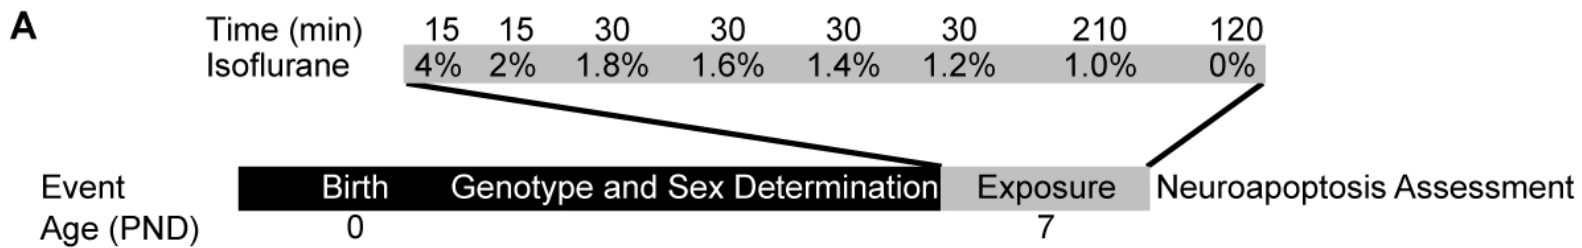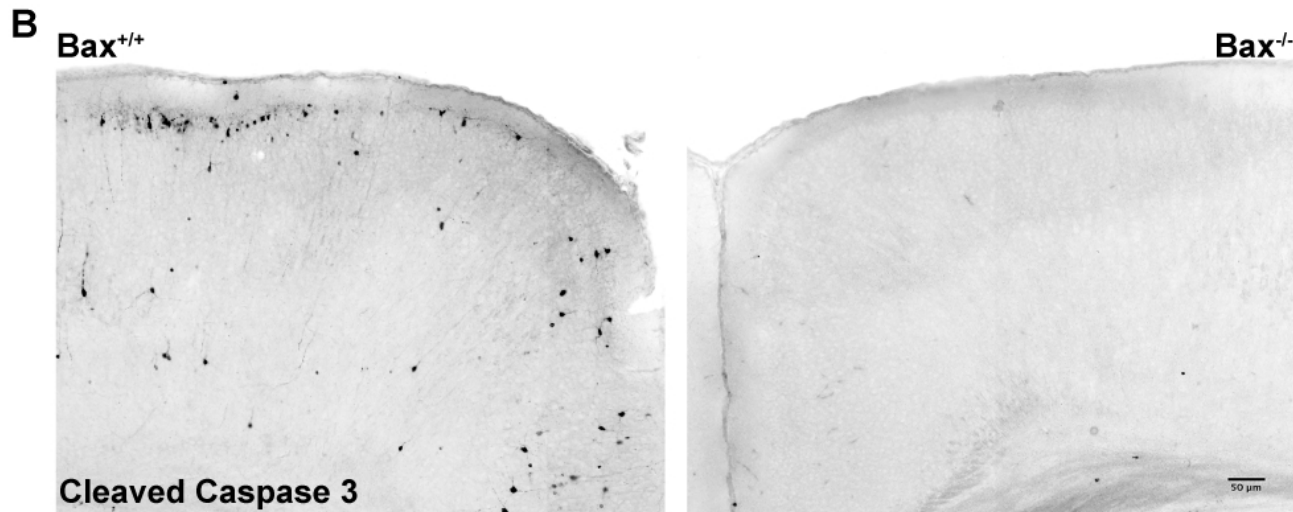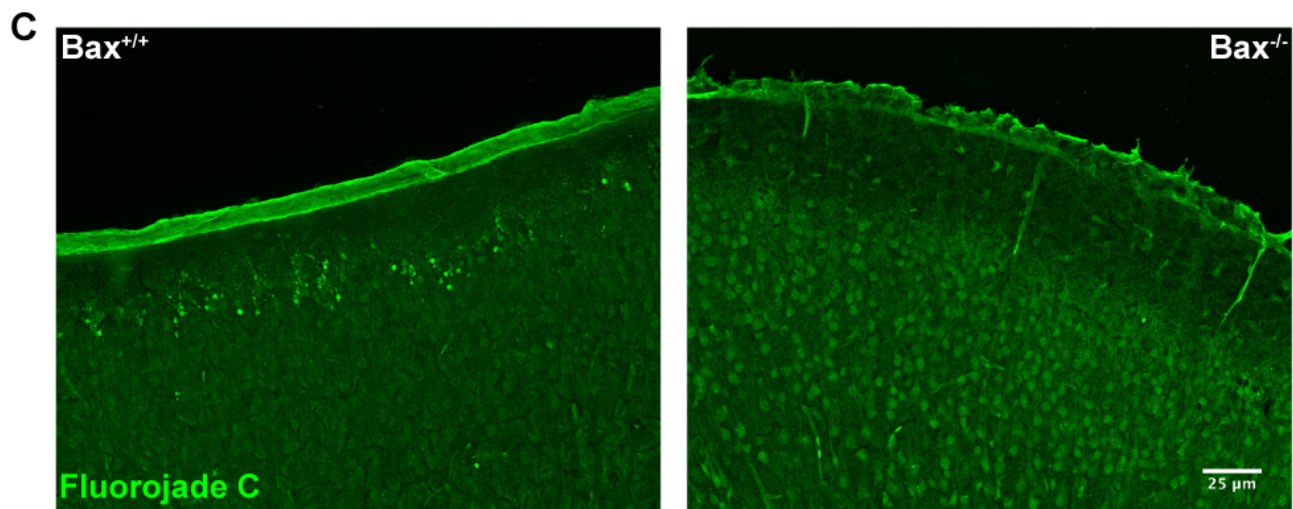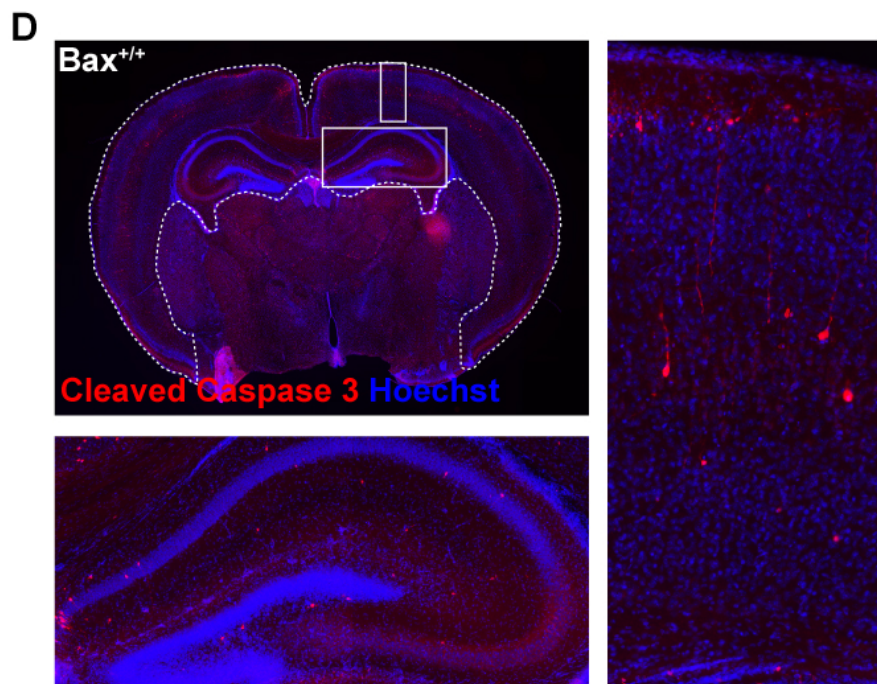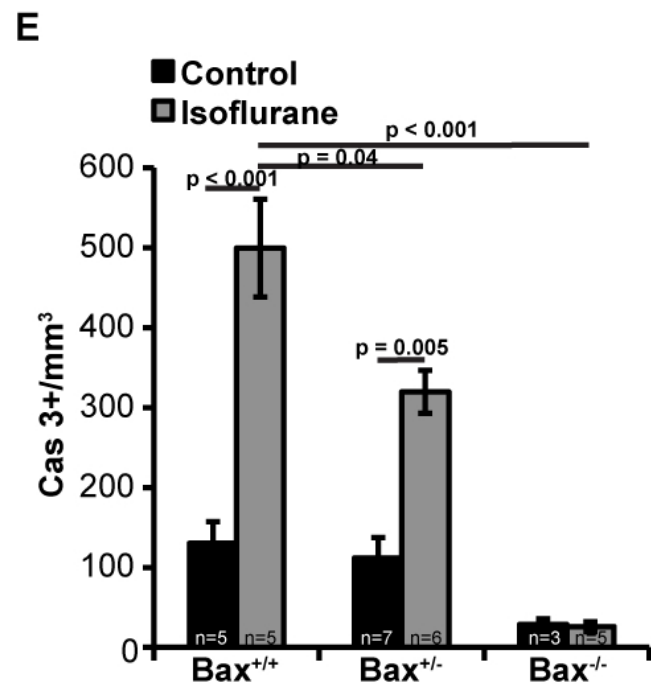



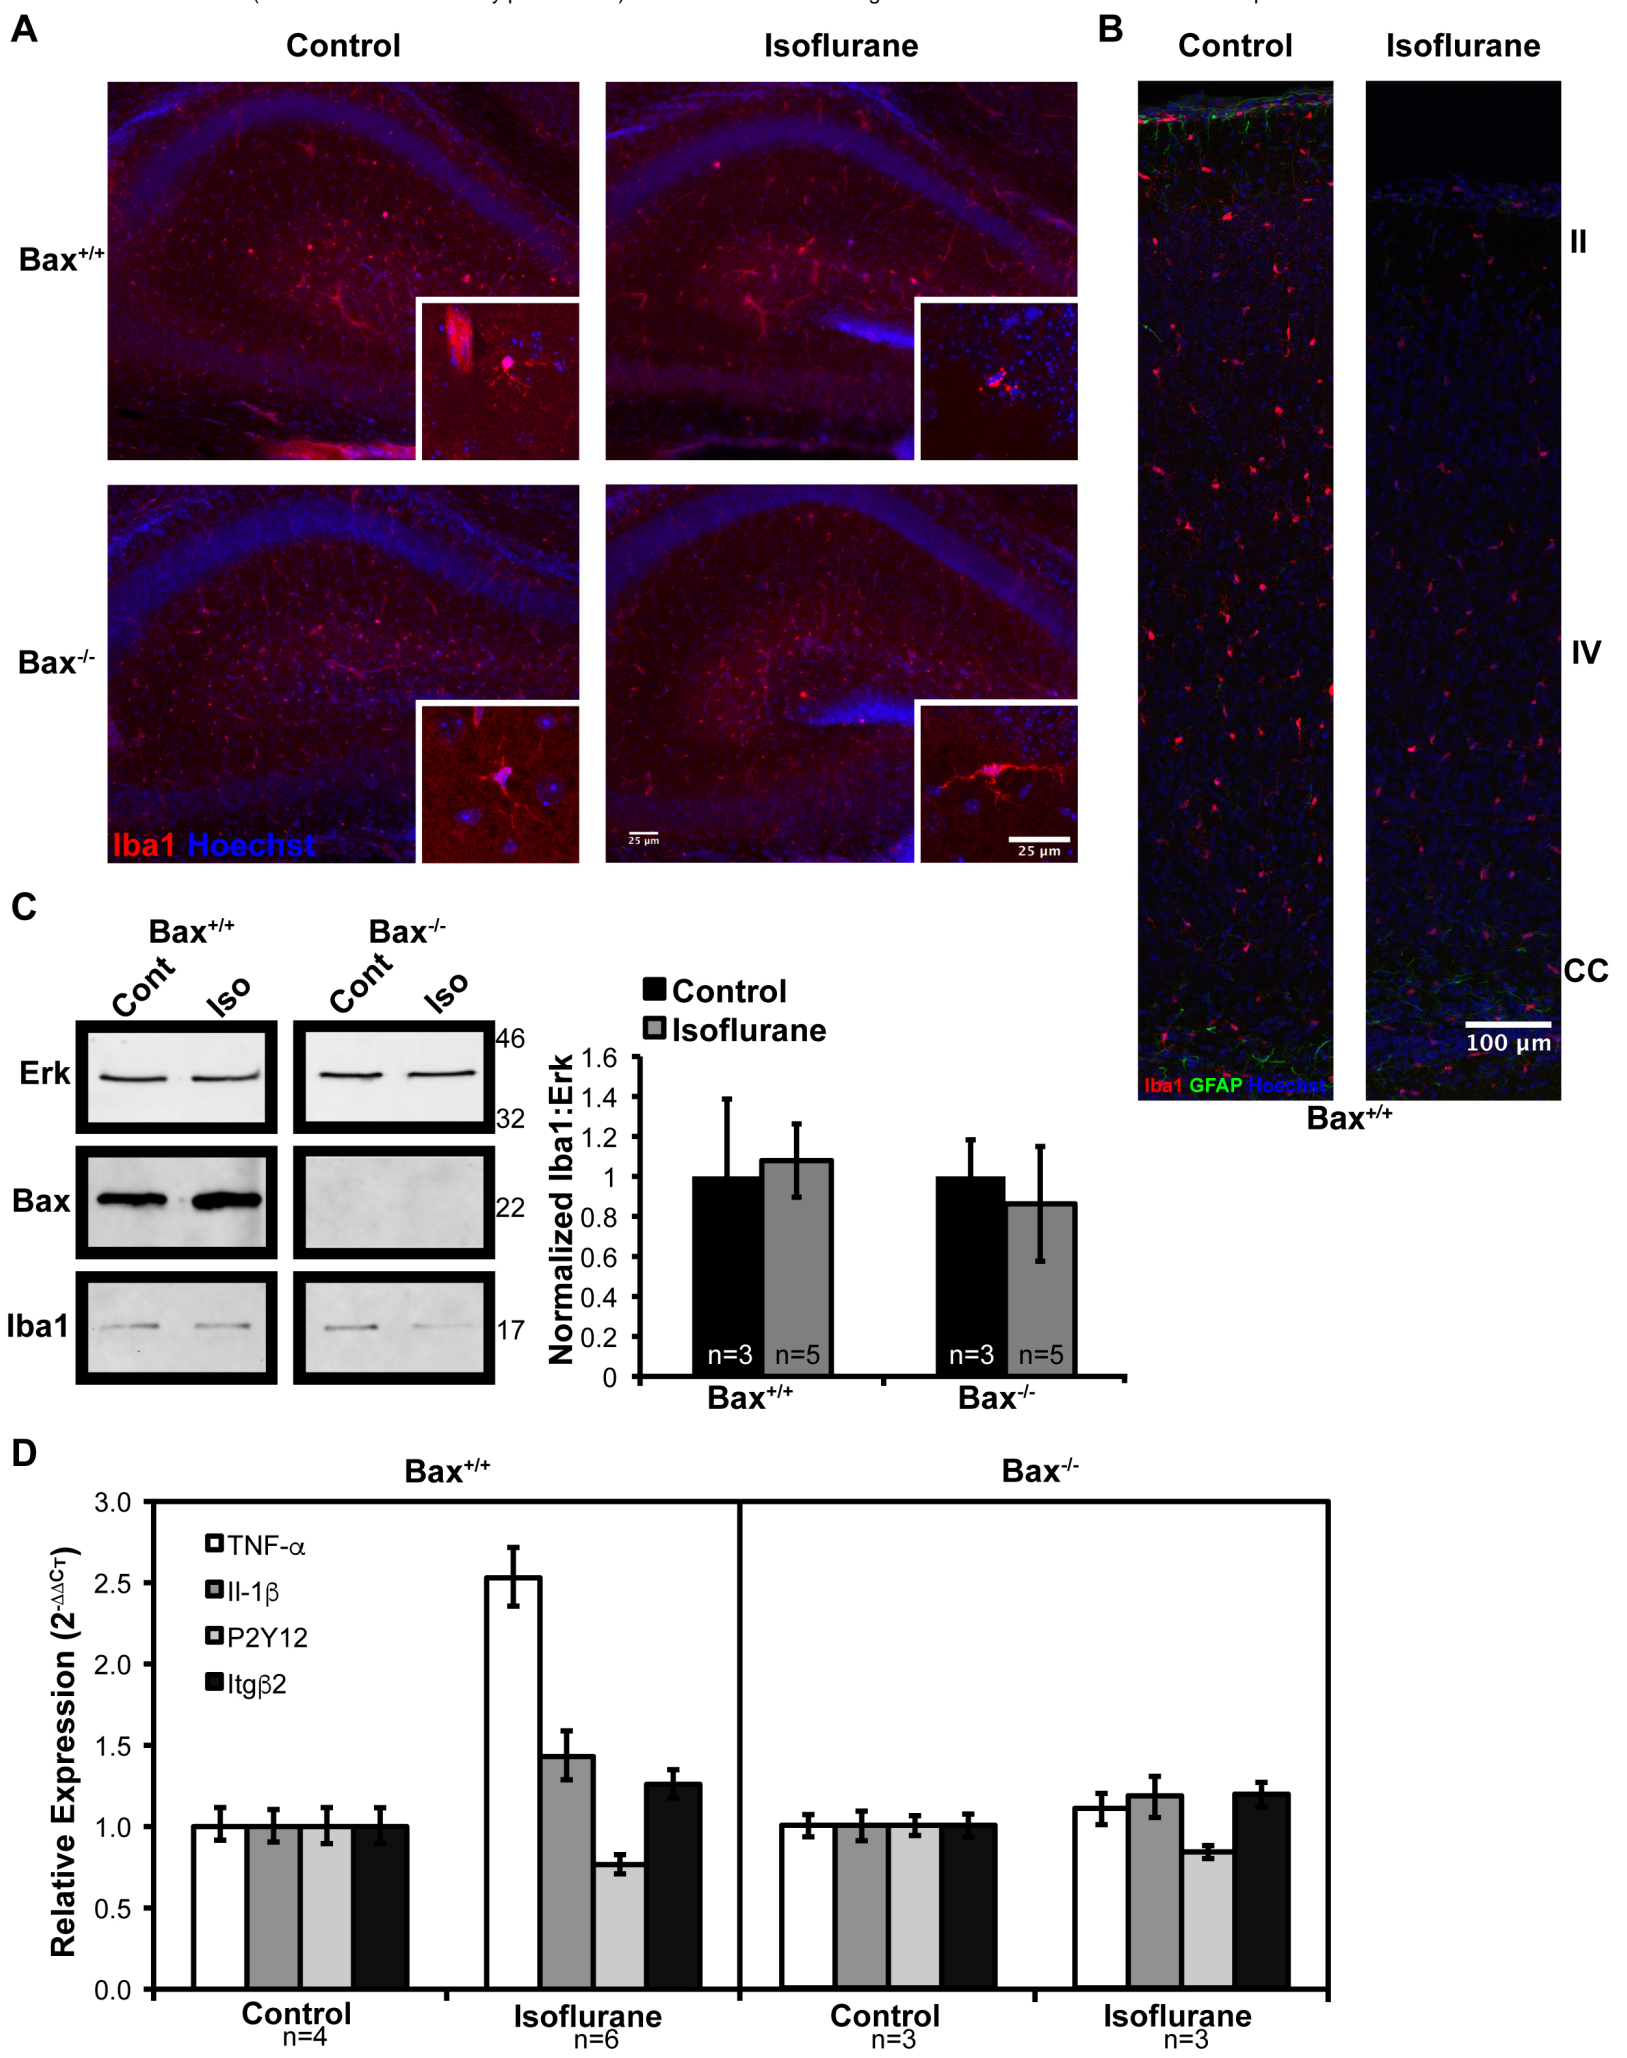

### Figure 3

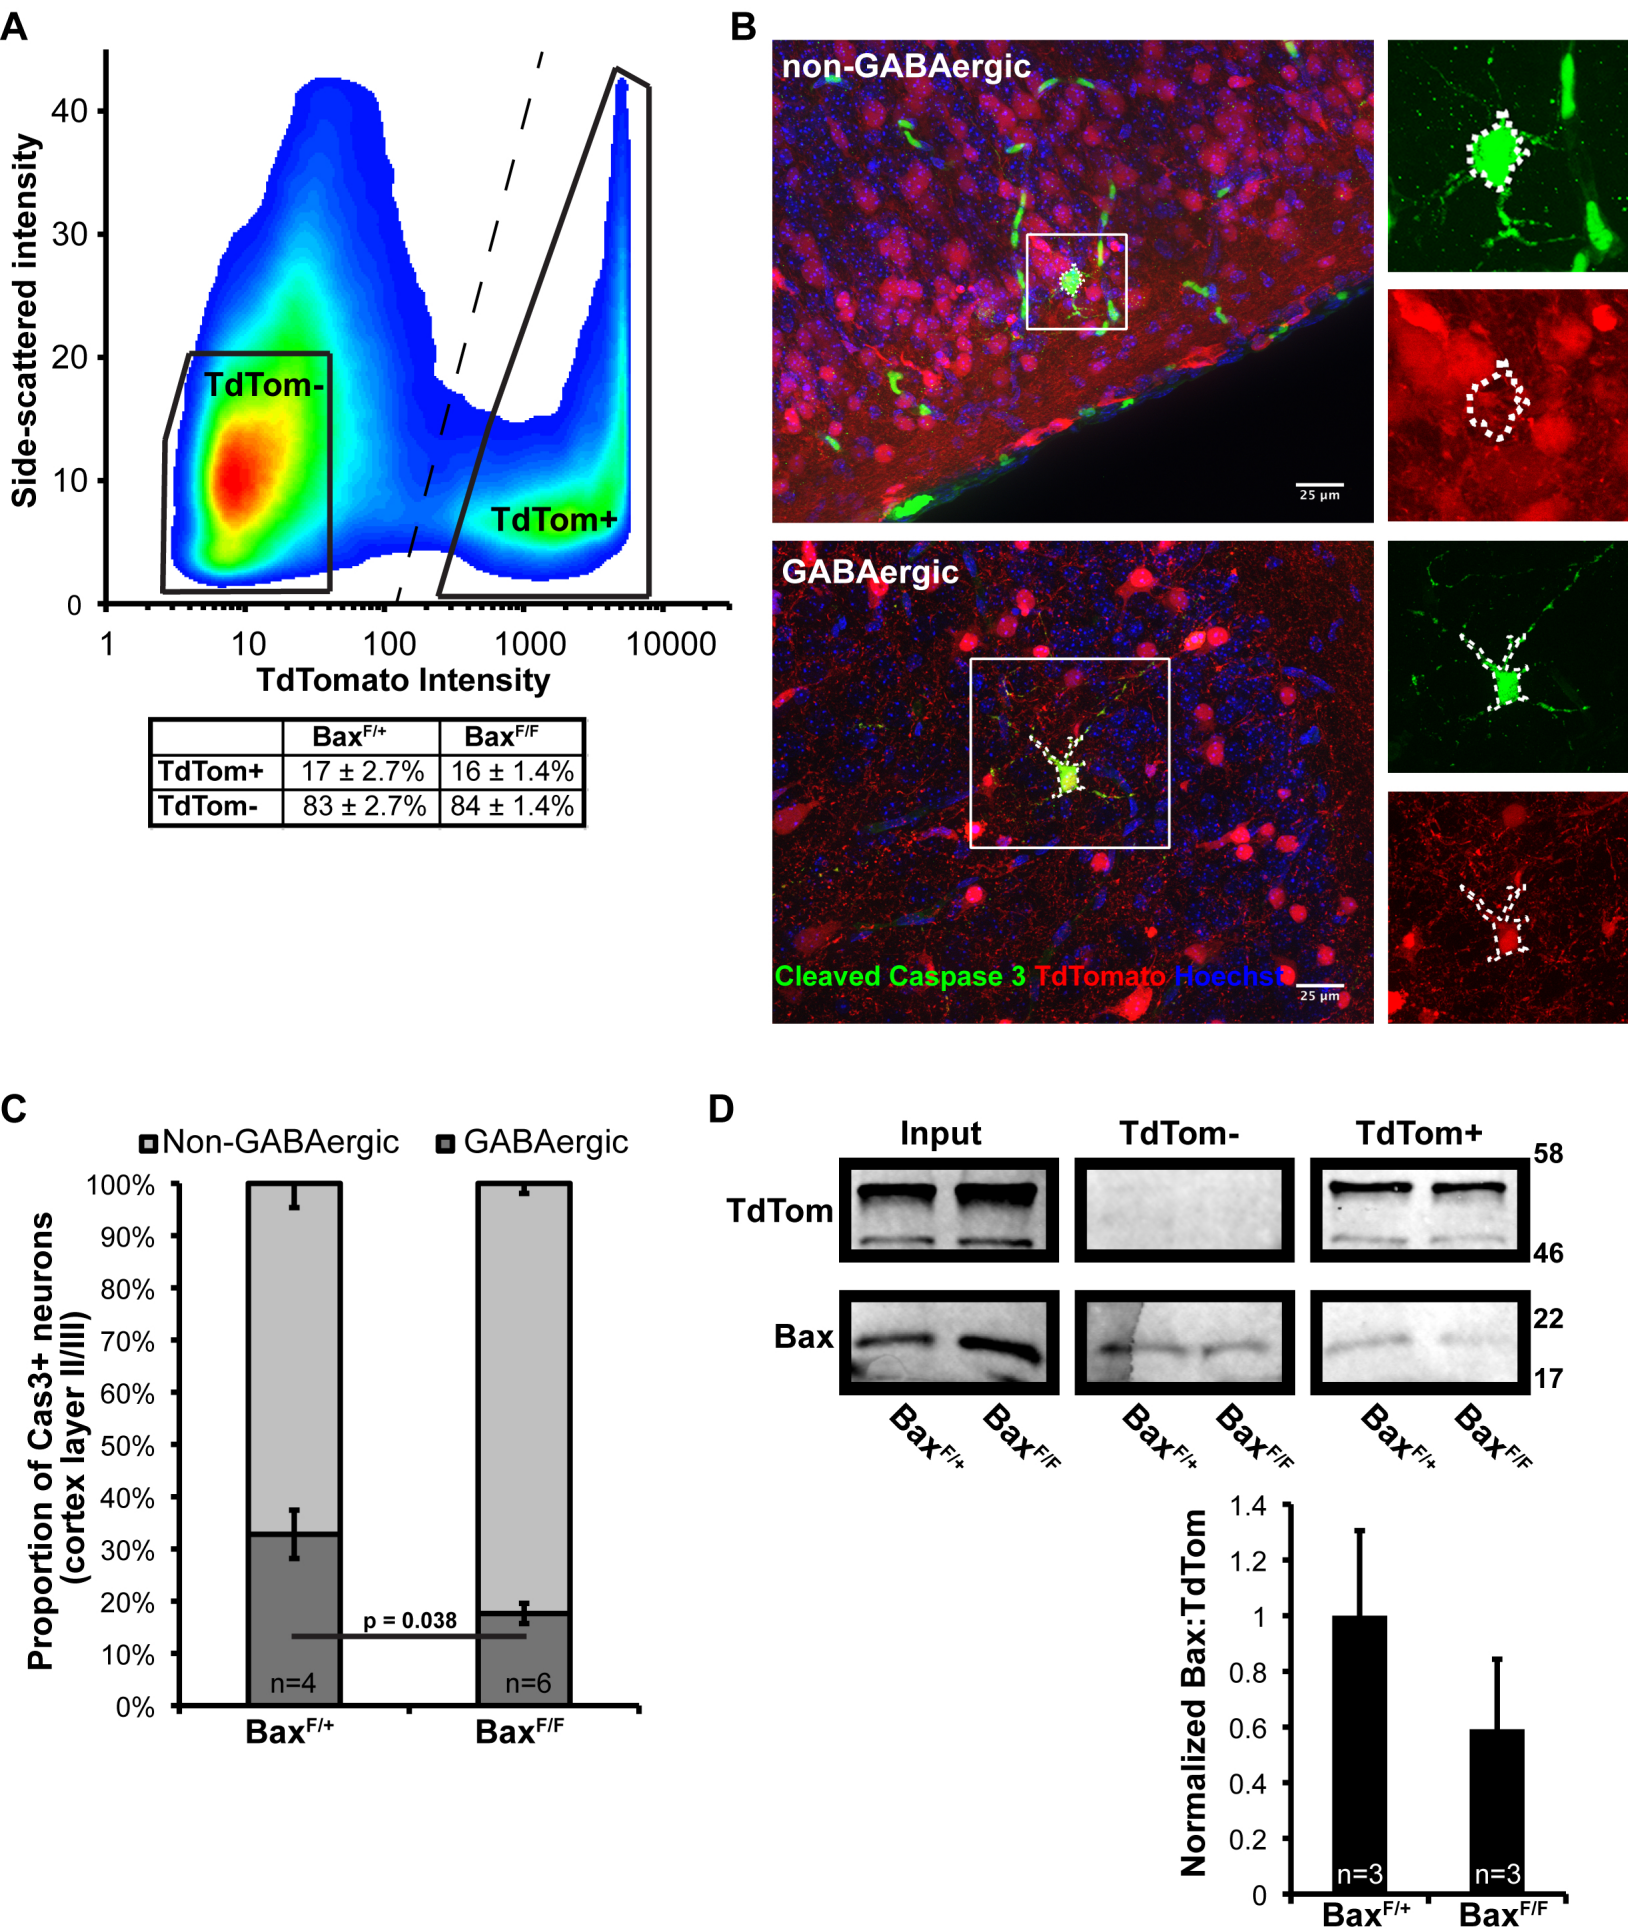

**A**

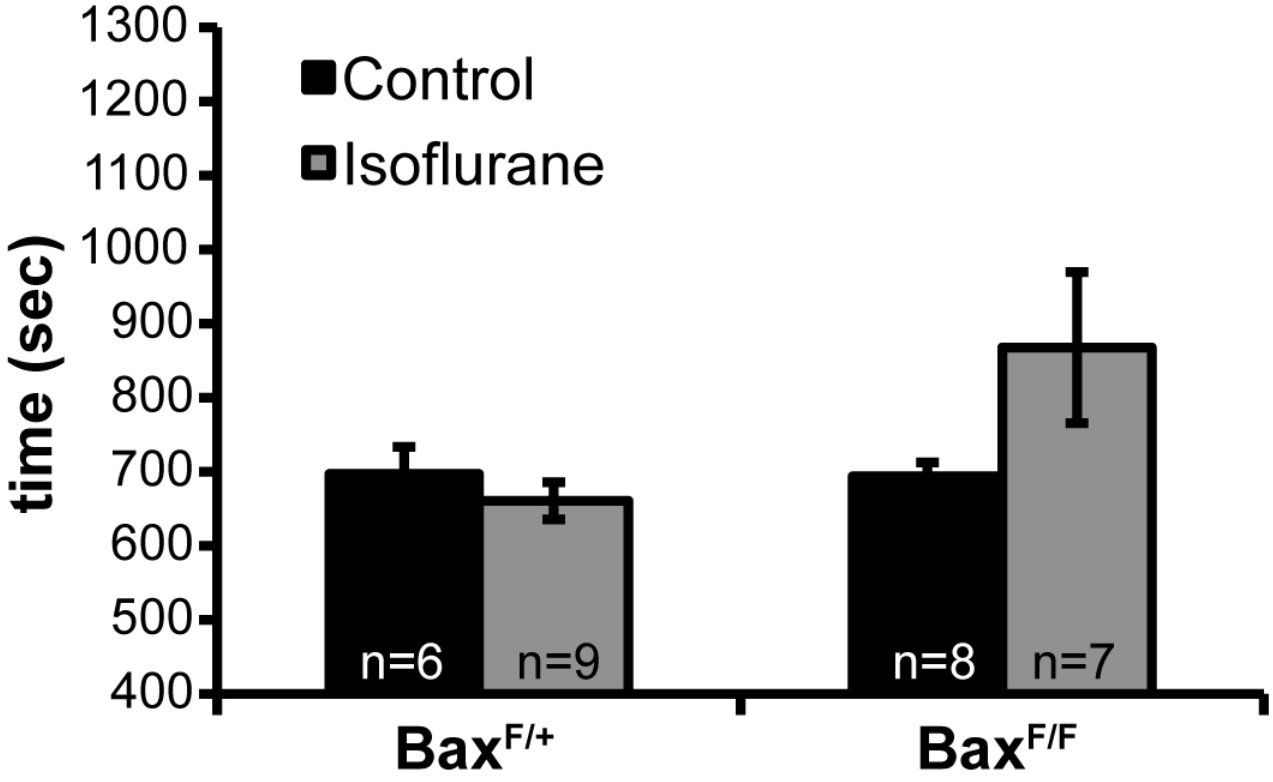

**B**

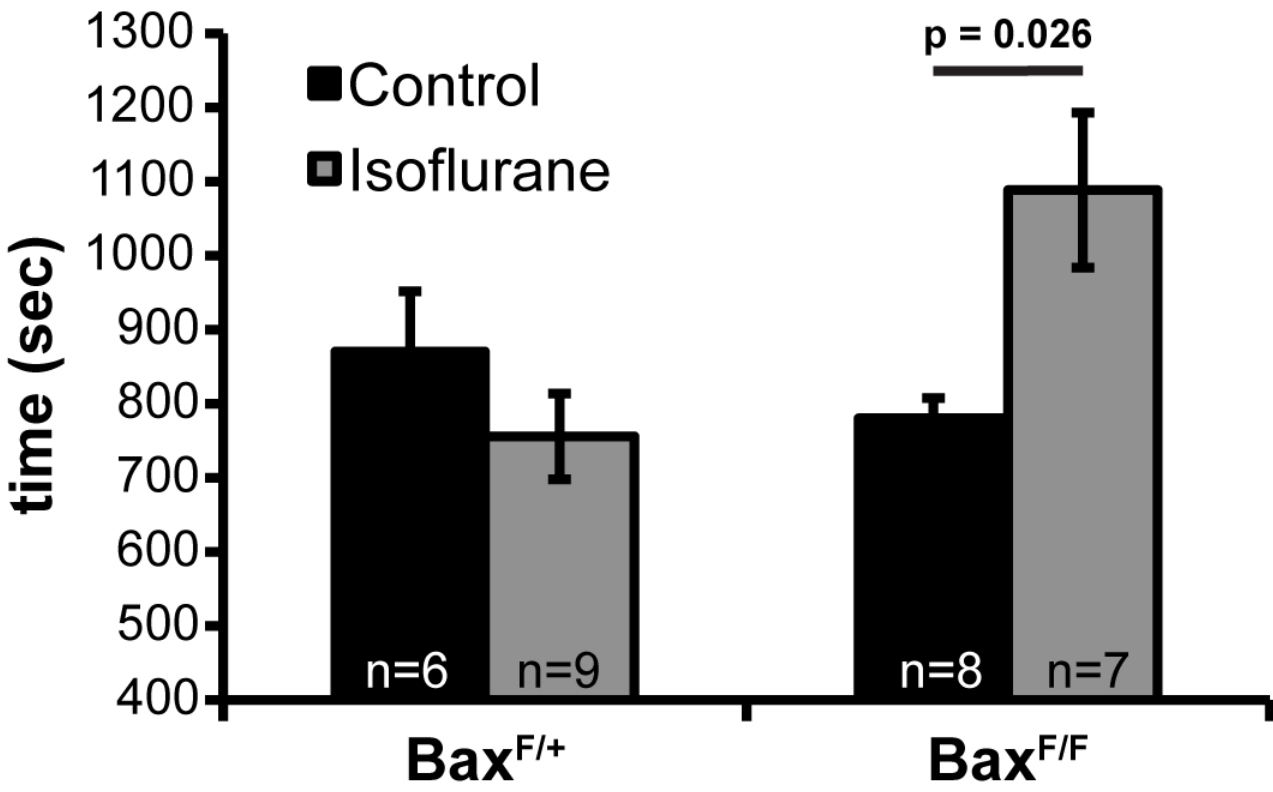

**Figure 5**

**A**

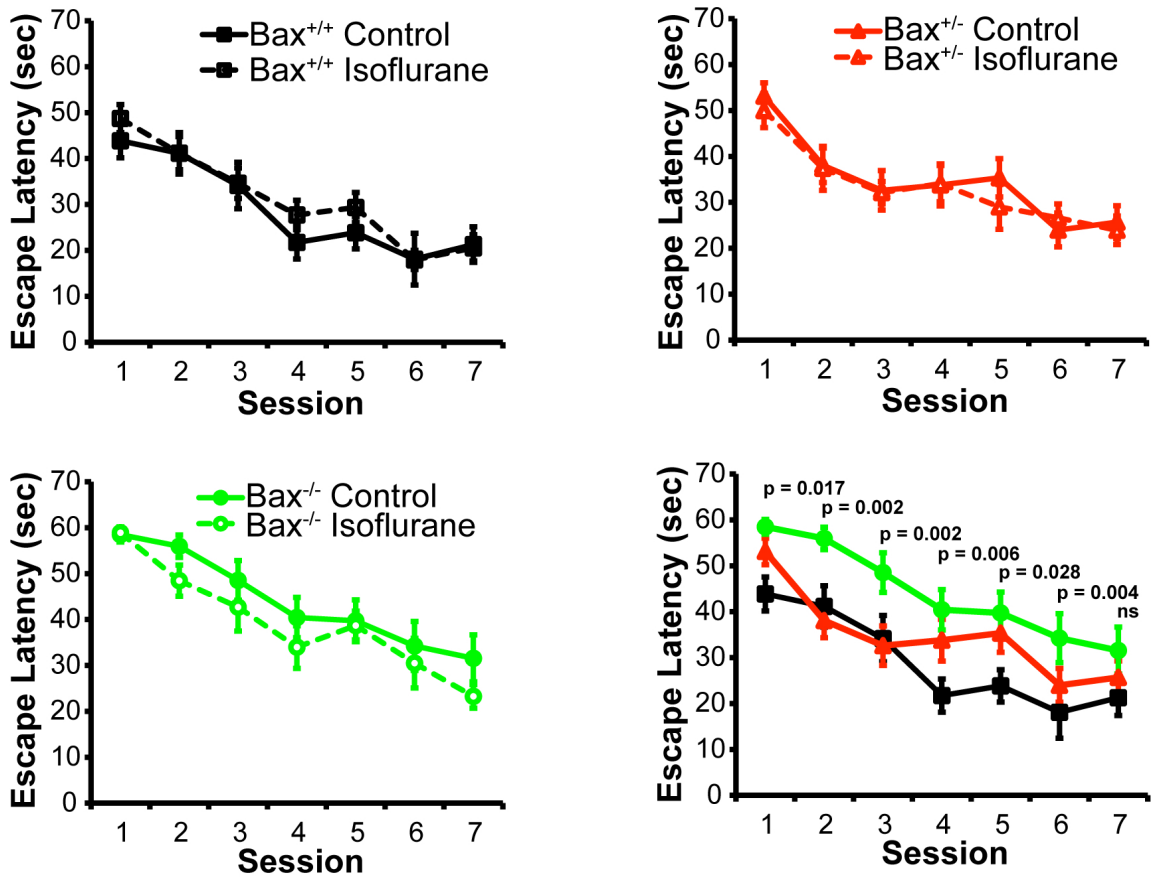

**B**

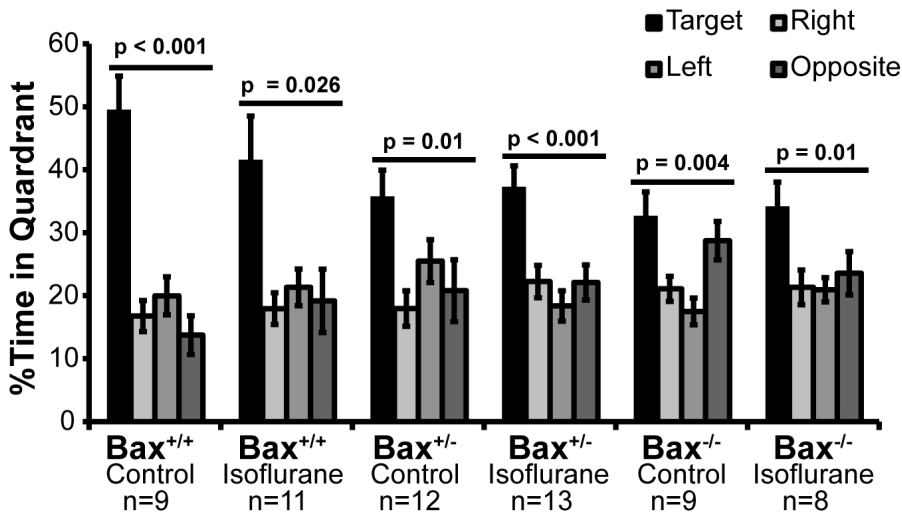

**C**

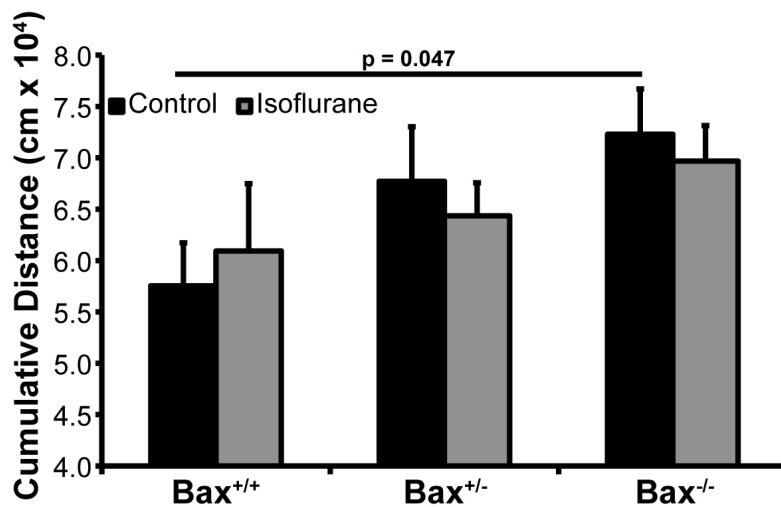

## Figure 6

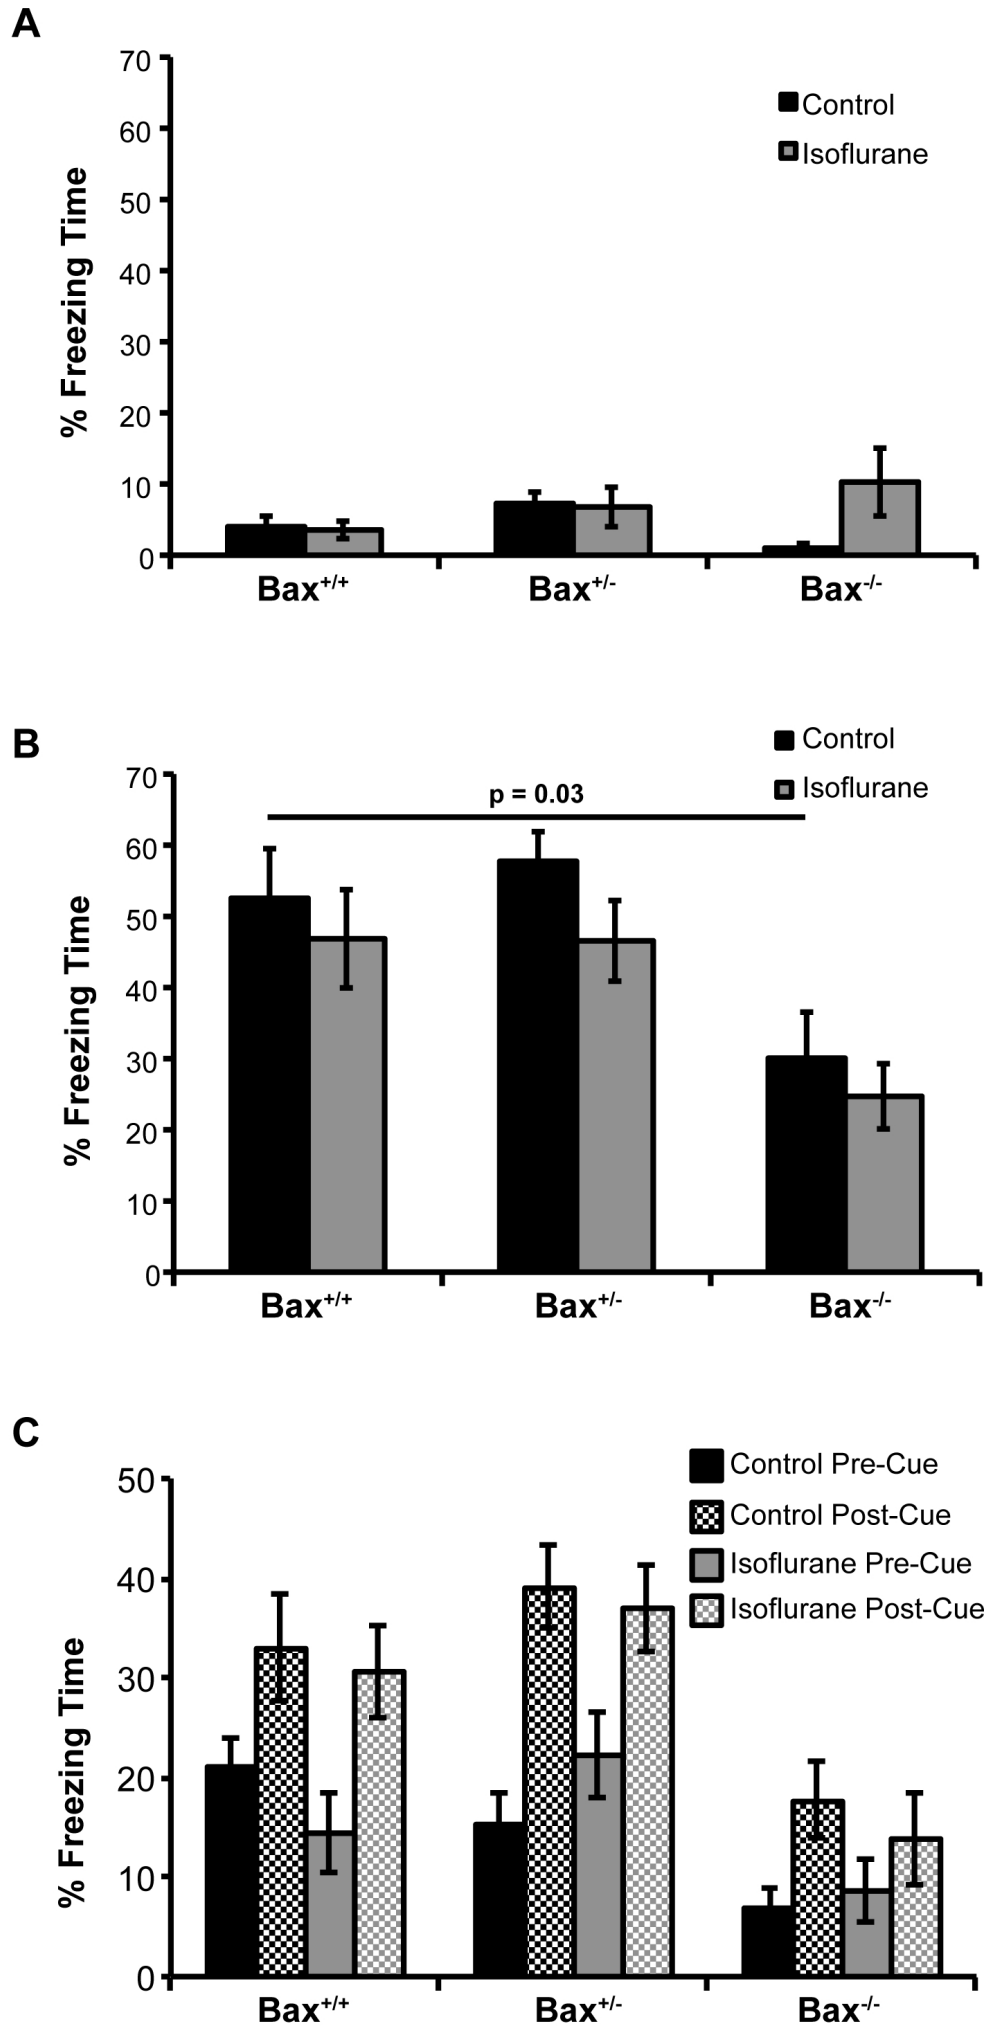

Source: https://biorxiv.org/content/10.1101/2020.08.25.267120v1.full.pdf
